# Supplementary material for: Agarose Hydrogels Enriched by Humic Acids as the Complexation Agent
Source: MDPI journal article supplement (doi:10.3390/polym12030687), 2020-03-19
Supplement: s1 [file s1]

## Supplementary Materials

### Agarose Hydrogels Enriched by Humic Acids as the Complexation Agent

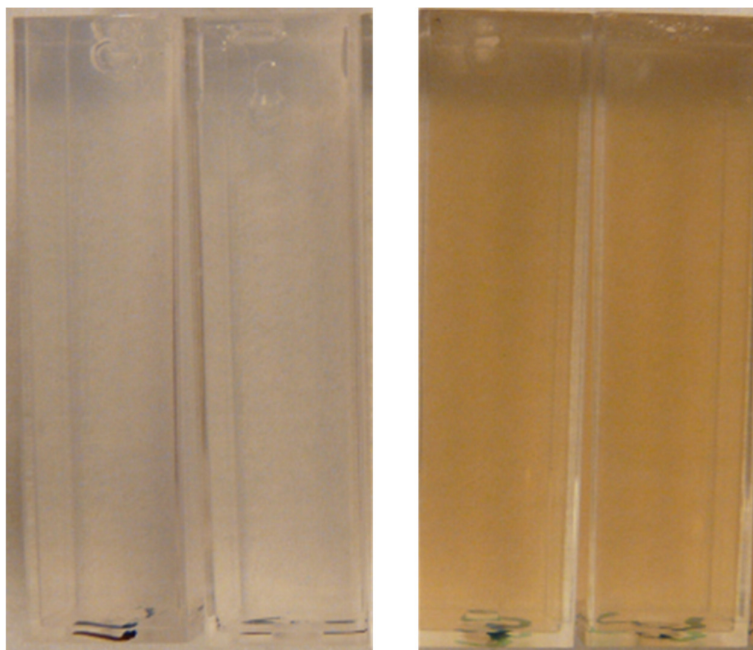

**Figure S1.** Pure agarose hydrogel (**left**) and agarose hydrogel enriched by humic acids (**right**) in cuvettes.

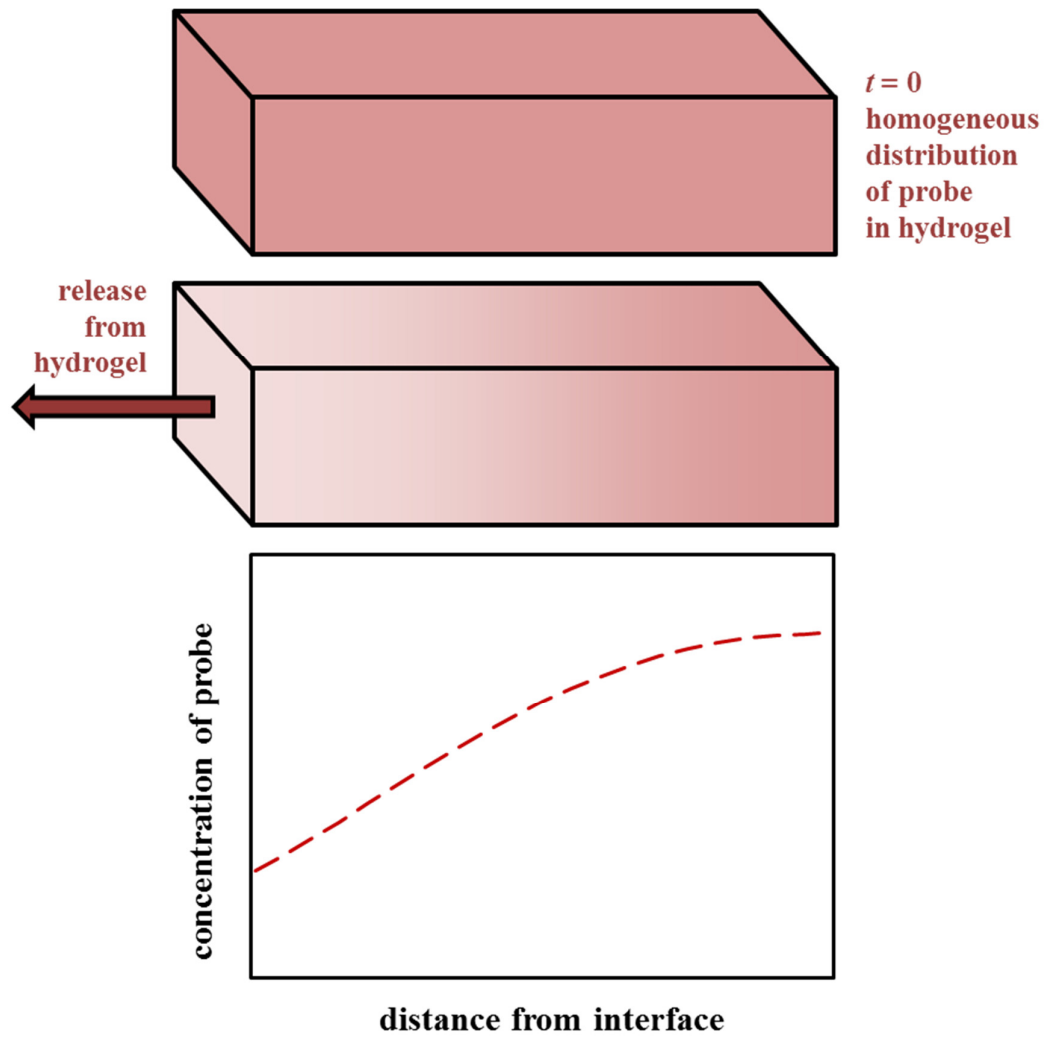

Figure S2. Schematic illustration of release experiment

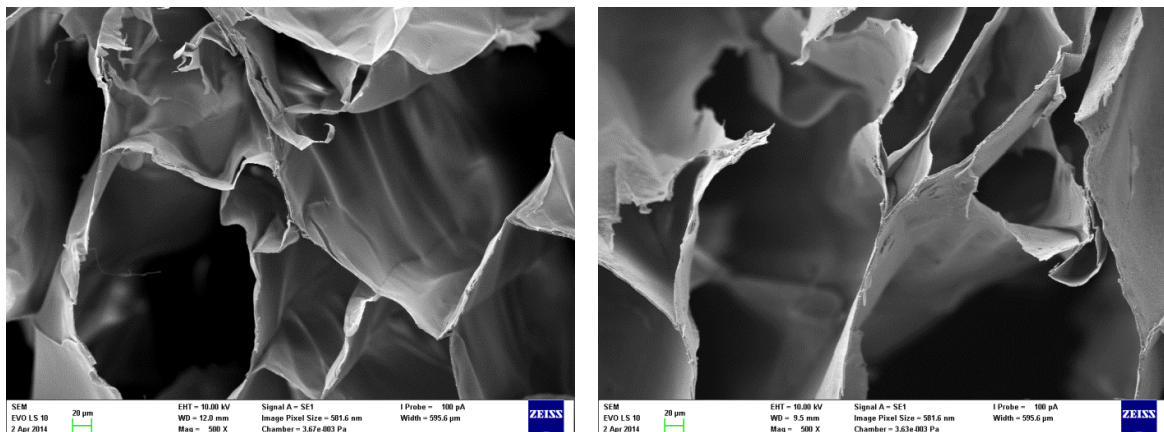

Figure S3. SEM of lyophilized hydrogels (ZEISS EVO LS 10): pure agarose hydrogel (left) and agarose hydrogel enriched by humic acids (right)
